# Supplementary material for: Selection of reliable reference genes for RT-qPCR analysis during developmental stages and abiotic stress in Setaria viridis
Source: PubMed Central journal article supplement (PMC4913262; doi:10.1038/srep28348), 2016-06-20
Supplement: srep28348-s1.pdf [file srep28348-s1.pdf]

**Selection of reliable reference genes for RT-qPCR analysis during developmental stages and abiotic stress in *Setaria viridis***

Polyana Kelly Martins<sup>1</sup>, Valéria Mafra<sup>2</sup>, Wagner Rodrigo de Souza<sup>1</sup>, Ana Paula Ribeiro<sup>1</sup>, Felipe Vinecky<sup>1</sup>, Marcos Fernando Basso<sup>1</sup>, Bárbara Andrade Dias Brito da Cunha<sup>1</sup>, Adilson Kenji Kobayashi<sup>1</sup> and Hugo Bruno Correa Molinari<sup>1\*</sup>

<sup>1</sup>Genetics and Biotechnology Laboratory, Embrapa Agroenergy (CNPAE), Brasília, DF, 70770-901, Brazil.

<sup>2</sup>Brazilian Bioethanol Science and Technology Laboratory/Brazilian Center of Research in Energy and Materials, Campinas, SP, 13083-100, Brazil.

\*Corresponding author: Phone: +55 61 3448 2307; +55 61 3448 1589. E-mail address: hugo.molinari@embrapa.br

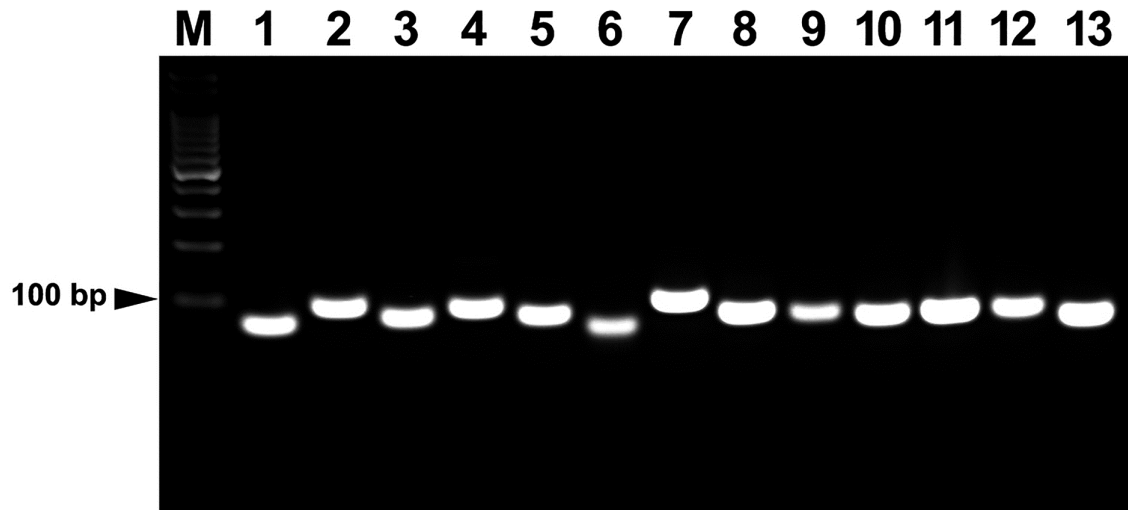

**Figure S1:** RT-qPCR amplification specificity of the 13 reference genes. Amplification fragments were separated by 2% agarose gel electrophoresis. 1 – *eIF4 $\alpha$* , 2 – *ACT*, 3 – *SDH*, 4 – *CAC*, 5 – *CUL*, 6 – *POL*, 7 – *APRT*, 8 – *EXP*, 9 – *BIND*, 10 – *KIN*, 11 – *GAPDH*, 12 – *SUI* and 13 – *EF1 $\alpha$* .

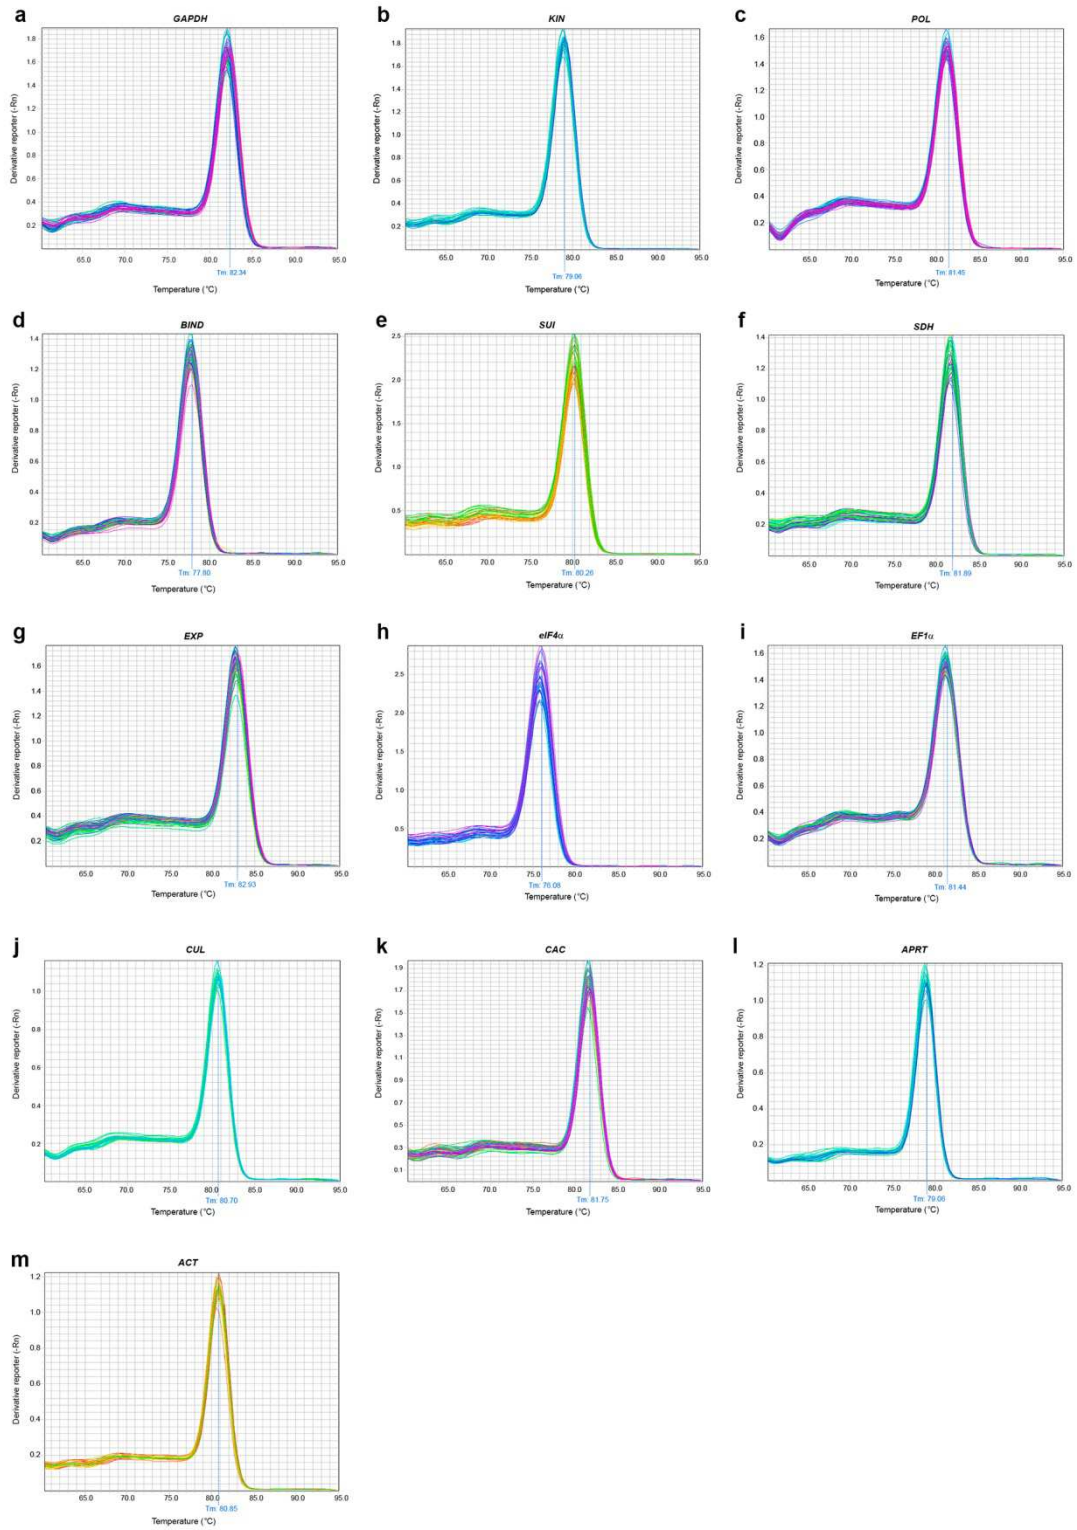

**Figure S2:** Dissociation curve data for the 13 reference genes tested. **(a)** *GAPDH*; **(b)** *KIN*; **(c)** *POL*; **(d)** *BIND*; **(e)** *SUI*; **(f)** *SDH*; **(g)** *EXP*; **(h)** *eIF4 $\alpha$* ; **(i)** *EF1 $\alpha$* ; **(j)** *CUL*; **(k)** *CAC*; **(l)** *APRT* and **(m)** *ACT*.

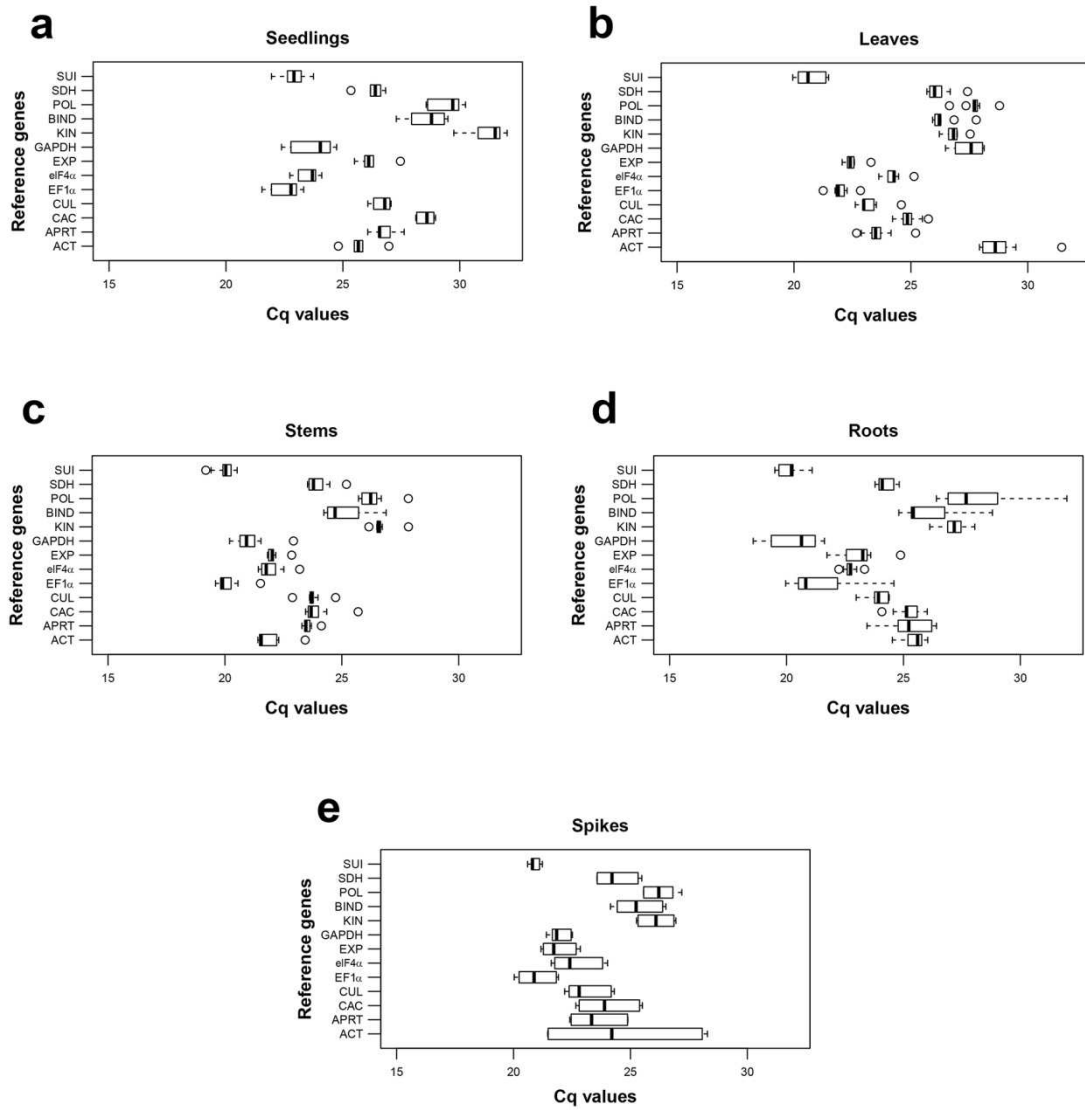

**Figure S3:** Expression level of reference genes tested in different tissues/organs. (a) Seedlings; (b) Leaves; (c) Stems; (d) Roots and (e) Spikes.

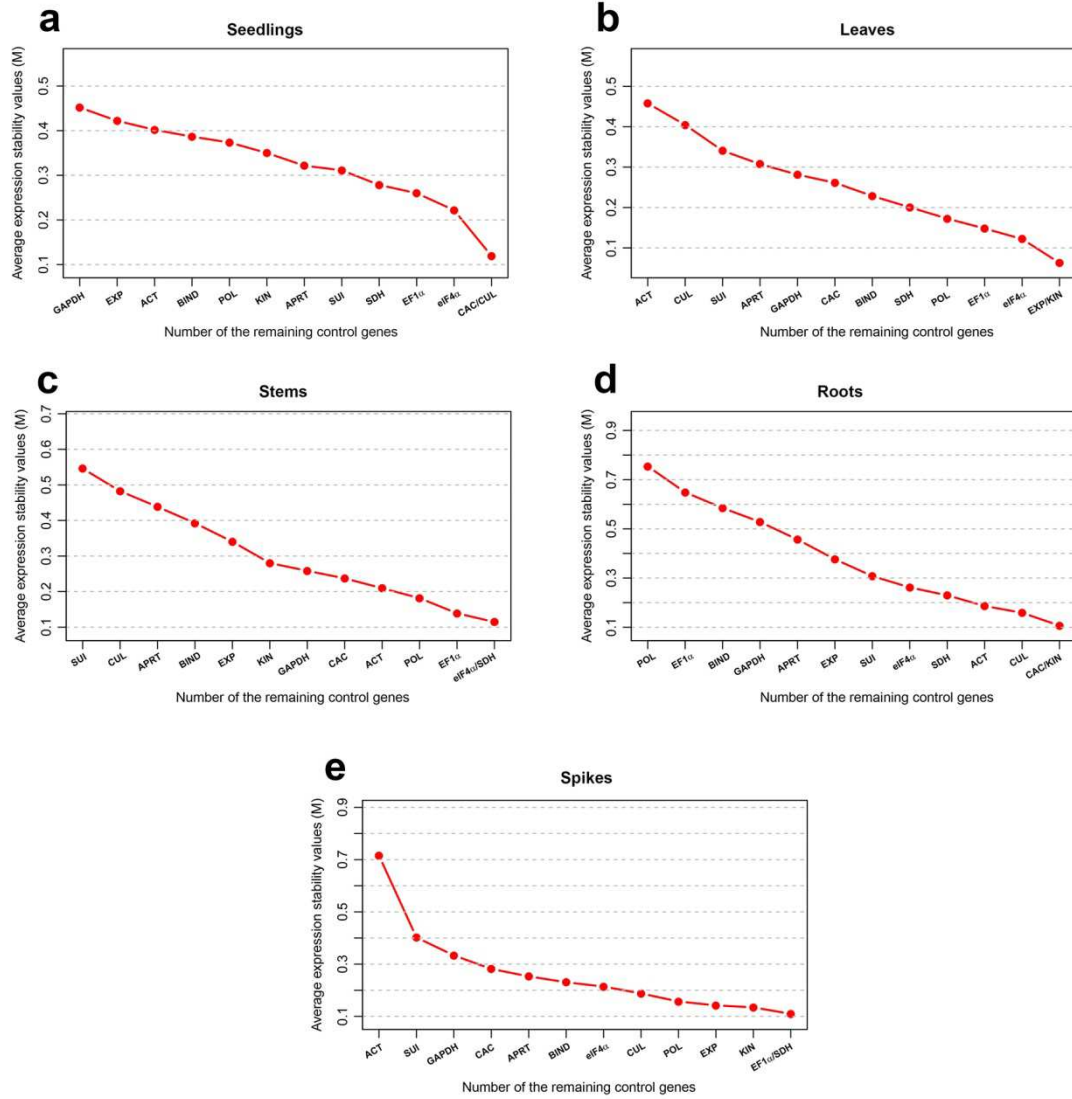

**Figure S4:** Average expression stability values (M) calculated by geNorm. A lower value of average expression stability (M) indicates most stable expression. **(a)** Seedlings; **(b)** Leaves; **(c)** Stems; **(d)** Roots and **(e)** Spikes.

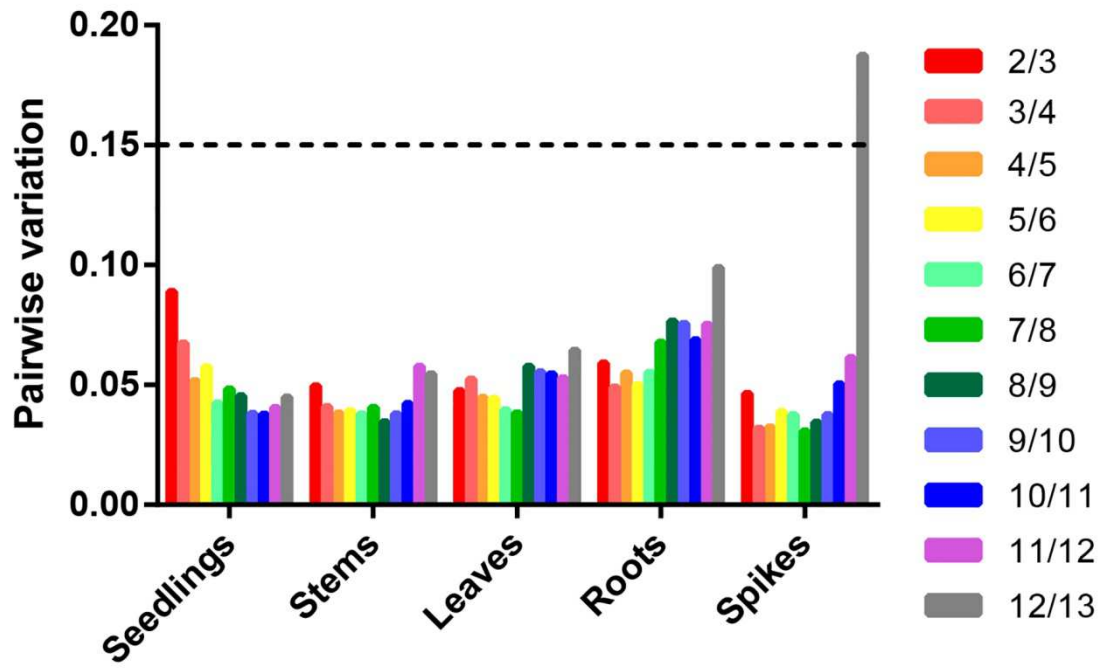

**Figure S5:** Pairwise variation (V) to define the optimal number of reference genes required to a more reliable normalization to seedlings, stems, leaves, roots and spikes.

**Table S1:** Information on reference and target genes used for qRT-PCR analysis

| Gene symbol  | Description                                  | Source sequence ID | <i>S. viridis</i> Phytozome ID | E-value  | <i>S. viridis</i> identity % | Primer sequences (5'-3')                                   | T <sub>m</sub> (°C) | Amplicon size (bp) | PCR Efficiency (%) | Reference |
|--------------|----------------------------------------------|--------------------|--------------------------------|----------|------------------------------|------------------------------------------------------------|---------------------|--------------------|--------------------|-----------|
| <i>ACT</i>   | <i>Actin</i>                                 | Si026509m          | Sevir.8G042300                 | 0        | 100                          | F: GCACCACCTGAGAGGAAAATATAG<br>R: CTCATCGTACTCCGCCTTTG     | 72.1<br>70.2        | 102                | 92                 | [29]      |
| <i>eIF4a</i> | Eukaryotic initiation factor 4-alpha         | CA275432.1         | Sevir.1G088000                 | 0        | 100                          | F: GTCTGCTAAGGTGCTGGATAAA<br>R: ACCACTCCTCCAGAACATAGA      | 69.0<br>69.1        | 78                 | 93                 | [27]      |
| <i>CUL</i>   | Cullin                                       | CF574093.1         | Sevir.3G038900                 | 1.6e-121 | 93.1                         | F: TCTCATCACGAGGGACTACTT<br>R: CTTGCCAACAACCACCAATC        | 69.2<br>68.0        | 85                 | 96                 | [27]      |
| <i>APRT</i>  | Anthranilate phosphoribosyl transferase      | CA089592.1         | Sevir.2G326600                 | 0        | 100                          | F: GGCAACGGCTATGTTTCTAATA<br>R: CCTCATCCAGAAGAACCCAAG      | 69.1<br>71.0        | 103                | 93                 | [28]      |
| <i>CAC</i>   | Clathrin adaptor complex                     | CA203604.1         | Sevir.1G284400                 | 2.3e-54  | 100                          | F: CTGCTTCTGGTCTTCGTGTT<br>R: GTATGATCCTGCTCTCGTGATG       | 68.2<br>71.1        | 98                 | 92                 | [27]      |
| <i>GAPDH</i> | Glyceraldehyde 3-phosphate dehydrogenase     | LOC_Os02g38920     | Sevir.1G225700                 | 2.1e-64  | 100                          | F: TGACAACAGGTCCAGCATCTTT<br>R: CGTACCAGGACACAAGCTTCAC     | 65.8<br>65.8        | 80                 | 91                 | [31]      |
| <i>SUI</i>   | Translation factor SUI1                      | LOC_Os07g34589     | Sevir.2G348300                 | 2e-90    | 100                          | F: CCAGAGCTTGGACAGGTCATTC<br>R: ACAATGCCAGCCTGGACAA        | 67.1<br>66.8        | 80                 | 90                 | [31]      |
| <i>KIN</i>   | Protein kinase                               | LOC_Os06g48970     | Sevir.4G252700                 | 5.8e-78  | 99.2                         | F: AAGTCCACTCGACCTTCAATCC<br>R: CTCAAGCGAACCGAATGAAAC      | 65.4<br>65.7        | 80                 | 94                 | [31]      |
| <i>BIND</i>  | RNA-binding protein                          | LOC_Os03g46770     | Sevir.9G090900                 | 3.5e-89  | 71.9                         | F: CTCGCGGTTTCGGCTTT<br>R: CCAAGTCCAGTCCATTCATTCC          | 66.4<br>66.6        | 81                 | 91                 | [31]      |
| <i>EF1a</i>  | Elongation Factor 1-alpha                    | Si022039m          | Sevir.3G272400                 | 0        | 96.1                         | F: TGGTATGCTTGTCACCTTTGGT<br>R: CTCGTGGTGCATCTCAACTGA      | 65.4<br>66.5        | 70                 | 92                 | [29]      |
| <i>POL</i>   | RNA polymerase II                            | Si033113m          | Sevir.2G148400                 | 0        | 92.9                         | F: TTGAGGCTTCGTGCCATTG<br>R: CGGTAGCAGCTGGTGACCAT          | 67.3<br>67.5        | 70                 | 93                 | [29]      |
| <i>SDH</i>   | Succinate dehydrogenase                      | Bradi1g26050       | Sevir.7G038300                 | 8.9e-83  | 100                          | F: ACAGTTCAGCGCTACGTTCT<br>R: GGTGGCTAGAGGGACGGATA         | 60.4<br>64.5        | 85                 | 90                 | [30]      |
| <i>EXP</i>   | Expressed protein                            | LOC_Os07g02340     | Sevir.9G362700                 | 3.6e-15  | 47.8                         | F: GGAACGCCGAGAAGAACAAG<br>R: ACATACTTTGCACTGGATGCTCAT     | 66.0<br>65.6        | 83                 | 92                 | [31]      |
| <i>GOLS2</i> | Glycosyl transferase                         | AT1G56600          | Sevir.2G450900                 | 2.6e-107 | 99.7                         | F: CGAGGACATCAAGATGCTGGTGAG<br>R: TCCAGGCTCTCGTCGTTGAAGATG | 71.0<br>72.4        | 62                 | 95                 | [35]      |
| <i>P5CS</i>  | $\Delta^1$ -pyrroline-5-carboxylate synthase | AT2G39800          | Sevir.5G386300                 | 6.4e-43  | 100                          | F: TTGGTCTAGGTGCAGAGGTTGG<br>R: AGCCCATCAACACCAACAGGTC     | 67.4<br>69.3        | 73                 | 100                | [36]      |
| <i>SuSy</i>  | Sucrose Synthase                             | AF263384           | Sevir.4G039300                 | 9.9e-149 | 99.9                         | F: CTGACTGGTGTGTACGGATTC<br>R: CTTGCCAGGCTACGGTATTT        | 71.0<br>68.0        | 107                | 91                 | [57]      |

**Table S2.** *Setaria viridis* reference genes ranked according to expression stability as determined by geNorm.

| Ranking          | Seedlings           |                 | Leaf                |                 | Stem                  |                 | Root                |                 | Spike               |                 |
|------------------|---------------------|-----------------|---------------------|-----------------|-----------------------|-----------------|---------------------|-----------------|---------------------|-----------------|
|                  | geNorm              | Stability value | geNorm              | Stability value | geNorm                | Stability value | geNorm              | Stability value | geNorm              | Stability value |
| 1                | <i>CAC</i>          | 0.12            | <i>EXP</i>          | 0.11            | <i>eIF4a</i>          | 0.06            | <i>CAC</i>          | 0.11            | <i>CAC</i>          | 0.11            |
| 2                | <i>CUL</i>          | 0.12            | <i>KIN</i>          | 0.11            | <i>SDH</i>            | 0.06            | <i>KIN</i>          | 0.11            | <i>KIN</i>          | 0.11            |
| 3                | <i>eIF4a</i>        | 0.22            | <i>eIF4a</i>        | 0.14            | <i>EF1a</i>           | 0.12            | <i>CUL</i>          | 0.16            | <i>CUL</i>          | 0.16            |
| 4                | <i>EF1a</i>         | 0.26            | <i>EF1a</i>         | 0.18            | <i>POL</i>            | 0.15            | <i>ACT</i>          | 0.19            | <i>ACT</i>          | 0.19            |
| 5                | <i>SDH</i>          | 0.28            | <i>POL</i>          | 0.21            | <i>ACT</i>            | 0.17            | <i>SDH</i>          | 0.23            | <i>SDH</i>          | 0.23            |
| 6                | <i>SUI</i>          | 0.31            | <i>SDH</i>          | 0.24            | <i>CAC</i>            | 0.20            | <i>eIF4a</i>        | 0.26            | <i>eIF4a</i>        | 0.26            |
| 7                | <i>APRT</i>         | 0.32            | <i>BIND</i>         | 0.26            | <i>GAPDH</i>          | 0.23            | <i>SUI</i>          | 0.31            | <i>SUI</i>          | 0.31            |
| 8                | <i>KIN</i>          | 0.35            | <i>CAC</i>          | 0.28            | <i>KIN</i>            | 0.26            | <i>EXP</i>          | 0.38            | <i>EXP</i>          | 0.38            |
| 9                | <i>POL</i>          | 0.37            | <i>GAPDH</i>        | 0.34            | <i>EXP</i>            | 0.28            | <i>APRT</i>         | 0.46            | <i>APRT</i>         | 0.46            |
| 10               | <i>BIND</i>         | 0.39            | <i>APRT</i>         | 0.39            | <i>BIND</i>           | 0.31            | <i>GAPDH</i>        | 0.53            | <i>GAPDH</i>        | 0.53            |
| 11               | <i>ACT</i>          | 0.40            | <i>SUI</i>          | 0.44            | <i>APRT</i>           | 0.34            | <i>BIND</i>         | 0.58            | <i>BIND</i>         | 0.58            |
| 12               | <i>EXP</i>          | 0.42            | <i>CUL</i>          | 0.48            | <i>CUL</i>            | 0.40            | <i>EF1a</i>         | 0.65            | <i>EF1a</i>         | 0.65            |
| 13               | <i>GAPDH</i>        | 0.45            | <i>ACT</i>          | 0.55            | <i>SUI</i>            | 0.46            | <i>POL</i>          | 0.75            | <i>POL</i>          | 0.75            |
| <b>Best pair</b> | <i>CAC/<br/>CUL</i> |                 | <i>EXP/<br/>KIN</i> |                 | <i>eIF4a/<br/>SDH</i> |                 | <i>CAC/<br/>KIN</i> |                 | <i>CAC/<br/>KIN</i> |                 |

**Table S3.** *Setaria viridis* reference genes ranked according to expression stability as determined by NormFinder.

| Ranking          | Seedlings            |                 | Leaf                |                 | Stem                  |                 | Root                |                 | Spike                  |                 |
|------------------|----------------------|-----------------|---------------------|-----------------|-----------------------|-----------------|---------------------|-----------------|------------------------|-----------------|
|                  | Norm Finder          | Stability value | Norm Finder         | Stability value | Norm Finder           | Stability value | Norm Finder         | Stability value | Norm Finder            | Stability value |
| 1                | <i>SDH</i>           | 0.01            | <i>EXP</i>          | -0.003          | <i>SDH</i>            | 0.004           | <i>EXP</i>          | 0.03            | <i>eIF4a</i>           | -0.02           |
| 2                | <i>EF1a</i>          | 0.01            | <i>KIN</i>          | 0.002           | <i>eIF4a</i>          | 0.007           | <i>ACT</i>          | 0.05            | <i>BIND</i>            | -0.01           |
| 3                | <i>eIF4a</i>         | 0.02            | <i>eIF4a</i>        | 0.004           | <i>EF1a</i>           | 0.009           | <i>CUL</i>          | 0.06            | <i>SDH</i>             | -0.01           |
| 4                | <i>CAC</i>           | 0.03            | <i>SDH</i>          | 0.011           | <i>EXP</i>            | 0.015           | <i>CAC</i>          | 0.06            | <i>CUL</i>             | -0.01           |
| 5                | <i>CUL</i>           | 0.04            | <i>BIND</i>         | 0.021           | <i>KIN</i>            | 0.021           | <i>KIN</i>          | 0.07            | <i>APRT</i>            | -0.01           |
| 6                | <i>SUI</i>           | 0.04            | <i>EF1a</i>         | 0.024           | <i>POL</i>            | 0.025           | <i>SDH</i>          | 0.07            | <i>EF1a</i>            | -0.01           |
| 7                | <i>KIN</i>           | 0.04            | <i>POL</i>          | 0.028           | <i>ACT</i>            | 0.026           | <i>eIF4a</i>        | 0.10            | <i>KIN</i>             | 0.02            |
| 8                | <i>APRT</i>          | 0.05            | <i>CAC</i>          | 0.040           | <i>CAC</i>            | 0.043           | <i>SUI</i>          | 0.11            | <i>CAC</i>             | 0.02            |
| 9                | <i>BIND</i>          | 0.07            | <i>GAPDH</i>        | 0.137           | <i>GAPDH</i>          | 0.059           | <i>BIND</i>         | 0.15            | <i>EXP</i>             | 0.02            |
| 10               | <i>POL</i>           | 0.07            | <i>APRT</i>         | 0.167           | <i>APRT</i>           | 0.061           | <i>APRT</i>         | 0.17            | <i>POL</i>             | 0.04            |
| 11               | <i>ACT</i>           | 0.08            | <i>SUI</i>          | 0.180           | <i>BIND</i>           | 0.118           | <i>EF1a</i>         | 0.29            | <i>GAPDH</i>           | 0.20            |
| 12               | <i>EXP</i>           | 0.13            | <i>CUL</i>          | 0.182           | <i>CUL</i>            | 0.200           | <i>GAPDH</i>        | 0.30            | <i>SUI</i>             | 0.40            |
| 13               | <i>GAPDH</i>         | 0.16            | <i>ACT</i>          | 0.331           | <i>SUI</i>            | 0.239           | <i>POL</i>          | 0.78            | <i>ACT</i>             | 2.85            |
| <b>Best pair</b> | <i>SDH/<br/>EF1a</i> |                 | <i>SDH/<br/>KIN</i> |                 | <i>eIF4a/<br/>EXP</i> |                 | <i>CUL/<br/>KIN</i> |                 | <i>eIF4a/<br/>APRT</i> |                 |
